# Supplementary material
Source: PubMed Central journal article supplement (PMC7869055)
Supplement: 10-1055-s-0040-1720978-s200678.pdf [file 10-1055-s-0040-1720978-s200678.pdf]

**Supplementary Table S1** Classification of anticoagulation regimens

| Route | Drug                               | Prophylactic dosing                 | Therapeutic dosing                                        |
|-------|------------------------------------|-------------------------------------|-----------------------------------------------------------|
| Oral  | Warfarin                           | None <sup>a</sup>                   | Any dose <sup>a</sup>                                     |
|       | Rivaroxaban                        | 10 mg daily <sup>a</sup>            | 10 mg bid, 15 mg daily, 15 mg bid, 20 mg bid <sup>a</sup> |
|       | Apixaban (GFR ≥30)                 | 2.5 mg bid                          | 5 mg bid                                                  |
|       | Apixaban (GFR < 30)                | 2.5 mg bid                          | 2.5 mg or 5 mg bid                                        |
| SC    | Enoxaparin (GFR ≥30)               | ≤0.5 mg/kg bid or ≤1.0 mg/kg daily  | ≥1 mg/kg bid or ≥1.5 mg/kg daily                          |
|       | Enoxaparin (GFR < 30)              | ≤0.35 mg/kg bid or ≤0.7 mg/kg daily | ≥0.7 mg/kg bid or ≥1 mg/kg daily                          |
|       | Enoxaparin no weight adjustment    | 30–60 mg daily                      | None                                                      |
|       | UFH                                | 4,000 IU - 10,000 units bid or tid  | None                                                      |
| IV    | UFH                                | None                                | Any dose                                                  |
|       | Bivalirudin                        | None                                | Any dose                                                  |
|       | Argatroban                         | None <sup>b</sup>                   | Any dose <sup>b</sup>                                     |
|       | TPA (tissue plasminogen activator) | None <sup>b</sup>                   | Any dose <sup>b</sup>                                     |
|       | Desirudin                          | None <sup>b</sup>                   | Any dose <sup>b</sup>                                     |

Abbreviations: bid, two times a day; GFR, glomerular filtration rate; IV, intravenous; SC, subcutaneous; tid, three times a day; UFH, unfractionated heparin.

<sup>a</sup>Too few patients in each category—all collapsed into therapeutic category with warfarin as “Rivwarf” and excluded from most analyses.

<sup>b</sup>Deleted due to fewer than 5 patients.

**Supplementary Table S2** Drug choice and indication

| Therapy            | No anticoagulation | Prophylaxis standard dose | Prophylaxis high dose | Therapy     | Total         |
|--------------------|--------------------|---------------------------|-----------------------|-------------|---------------|
| Apixaban           | 0                  | 554                       | 0                     | 474         | 1,028 (28.4%) |
| Enoxaparin         | 0                  | 748                       | 0                     | 84          | 832 (23.0%)   |
| Heparin standard   | 0                  | 796                       | 0                     | 0           | 796 (22.0%)   |
| Heparin high dose  | 0                  | 0                         | 176                   | 0           | 176 (4.9%)    |
| IV heparin         | 0                  | 0                         | 0                     | 79          | 79 (2.2%)     |
| Other              | 0                  | 2                         | 0                     | 73          | 75 (2.1%)     |
| No anticoagulation | 639                | 0                         | 0                     | 0           | 639 (17.6%)   |
| Total              | 639 (17.6%)        | 2,100 (57.9%)             | 176 (4.9%)            | 710 (19.6%) | 3,625 (100%)  |

Abbreviation: IV, intravenous.

**Supplementary Table S3** Chosen therapy by first D-dimer within 48 hours of admission

|                            | D-dimer level (µg/mL) |             |             |            | No D-dimer obtained | Total       |
|----------------------------|-----------------------|-------------|-------------|------------|---------------------|-------------|
|                            | < 1                   | 1–3         | > 3–10      | > 10       |                     |             |
| No therapy                 | 105 (13.5%)           | 116 (11.5%) | 57 (12.5%)  | 38 (13.7%) | 323 (29.4%)         | 639 (17.6%) |
| Apixaban prophylaxis       | 211 (27.1%)           | 264 (26.1%) | 26 (5.7%)   | 17 (6.1%)  | 36 (3.3%)           | 554 (15.3%) |
| Apixaban therapy           | 59 (7.6%)             | 128 (12.6%) | 166 (36.3%) | 77 (27.7%) | 44 (4.0%)           | 474 (13.1%) |
| Enoxaparin prophylaxis     | 223 (28.6%)           | 222 (21.9%) | 67 (14.7%)  | 27 (9.7%)  | 209 (19.0%)         | 748 (20.6%) |
| Enoxaparin therapy         | 6 (0.8%)              | 17 (1.7%)   | 32 (7.0%)   | 25 (9.0%)  | 4 (0.4%)            | 84 (2.3%)   |
| UFH prophylaxis            | 122 (15.7%)           | 193 (19.1%) | 57 (12.5%)  | 55 (19.8%) | 369 (33.6%)         | 796 (22.0%) |
| UFH HD prophylaxis         | 26 (3.3%)             | 44 (4.3%)   | 22 (4.8%)   | 6 (2.2%)   | 78 (7.1%)           | 176 (22.0%) |
| UFH therapy                | 9 (1.2%)              | 17 (1.7%)   | 17 (3.7%)   | 28 (10.1%) | 8 (0.7%)            | 79 (2.2%)   |
| Other                      | 18 (2.3%)             | 12 (1.2%)   | 13 (2.8%)   | 5 (1.8%)   | 27 (2.5%)           | 75 (2.2%)   |
| Total for D-dimer category | 779                   | 1,013       | 457         | 278        | 1,098               | 3,625       |
| % of Total                 | 21.5%                 | 27.9%       | 12.6%       | 7.7%       | 30.3%               | 100.0%      |

Abbreviations: HD, high dose; UFH, unfractionated heparin.

**Supplementary Table S4** Logistic regression analysis of variables: adjusted odds ratios for mortality outcome ( $n = 2,450$ )

| Variable                                   | Odds ratio | 95% Confidence interval | p-Value |
|--------------------------------------------|------------|-------------------------|---------|
| <b>Age, y</b>                              |            |                         |         |
| < 50                                       | 1.00       |                         |         |
| 50–60                                      | 2.55       | 1.44–4.52               | 0.001   |
| 60–70                                      | 3.87       | 2.53–6.66               | < 0.001 |
| 70–80                                      | 5.71       | 3.32–9.84               | < 0.001 |
| ≥ 80                                       | 8.77       | 5.04–15.28              | < 0.001 |
| <b>Oxygen saturation, %</b>                |            |                         |         |
| > 95%                                      | 1.00       |                         |         |
| 90–95%                                     | 1.62       | 1.22–2.15               | 0.001   |
| < 90%                                      | 2.83       | 2.12–3.79               | < 0.001 |
| <b>eGFR mL/min</b>                         |            |                         |         |
| > 60                                       | 1.00       |                         |         |
| ≥ 30–60                                    | 1.77       | 1.32–2.38               | < 0.001 |
| 15–30                                      | 2.68       | 1.87–3.85               | < 0.001 |
| 0–15                                       | 1.92       | 1.31–2.81               | < 0.001 |
| <b>D-dimer, µg/mL</b>                      |            |                         |         |
| < 1                                        | 1.00       |                         |         |
| 1–3                                        | 1.61       | 1.15–2.26               | 0.005   |
| 3–10                                       | 1.99       | 1.35–2.92               | < 0.001 |
| ≥ 10                                       | 2.65       | 1.74–4.04               | < 0.001 |
| <b>Time period</b>                         |            |                         |         |
| First time period                          | 1.00       |                         |         |
| Wave                                       | 0.59       | 0.45–0.76               | < 0.001 |
| <b>Ventilator needed first 48 h</b>        |            |                         |         |
| No ventilator needed                       | 1.00       |                         |         |
| Ventilator needed                          | 10.34      | 6.86–15.61              | < 0.001 |
| <b>Medication and regimen, intent type</b> |            |                         |         |
| No anticoagulation                         | 1.00       |                         |         |
| Apixaban prophylaxis                       | 0.52       | 0.33–0.82               | 0.005   |
| Apixaban full therapy                      | 0.63       | 0.42–0.94               | 0.025   |
| Enoxaparin prophylaxis                     | 0.50       | 0.33–0.77               | 0.002   |
| Enoxaparin full therapy                    | 0.96       | 0.50–1.82               | 0.90    |
| UFH prophylaxis bid                        | 0.82       | 0.55 - 1.23             | 0.34    |
| UFH prophylaxis tid                        | 0.84       | 0.44–1.61               | 0.60    |
| UFH full therapy                           | 0.66       | 0.33–1.34               | 0.25    |

Abbreviations: bid, two times a day; eGFR, estimated glomerular filtration rate; tid, three times a day; UFH, unfractionated heparin.  
 Note: Adjusted for age, oxygen saturation, eGFR, D-dimer, time period, and ventilator requirement.

**Supplementary Table S5** Adjusted mortality per therapeutic modality, stratified by D-dimer (DD): odds ratios and confidence intervals (n = 2,450)

| n = 2,450             | Apixaban                               |                                         | Enoxaparin                              |                                       | Enoxaparin                            |                                        | UFH                                    |                                        | UFH high dose                           |                                       | UFH                                     |                                        |
|-----------------------|----------------------------------------|-----------------------------------------|-----------------------------------------|---------------------------------------|---------------------------------------|----------------------------------------|----------------------------------------|----------------------------------------|-----------------------------------------|---------------------------------------|-----------------------------------------|----------------------------------------|
|                       | Prophylaxis                            | Therapy                                 | Prophylaxis                             | Therapy                               | Prophylaxis                           | Therapy                                | Prophylaxis                            | Therapy                                | Prophylaxis                             | Therapy                               | Prophylaxis                             | Therapy                                |
| DD < 1<br>(n = 751)   | 0.87<br>95% CI: 0.26-2.88<br>p = 0.82  | 1.72<br>95% CI: 0.51-5.79<br>p = 0.38   | 0.93<br>95% CI: 0.31-2.81<br>p = 0.89   | 5.78<br>95% CI: 0.49-68.2<br>p = 0.16 | 2.20<br>95% CI: 0.76-6.38<br>p = 0.15 | 1.71<br>95% CI: 0.27-10.86<br>p = 0.57 | 2.50<br>95% CI: 0.32-19.73<br>p = 0.38 | 0.49<br>95% CI: 0.25-0.94<br>p = 0.033 | 0.48<br>95% CI: 0.23-0.97<br>p = 0.041  | 0.78<br>95% CI: 0.36-1.72<br>p = 0.54 | 0.15<br>95% CI: 0.09-0.70<br>p = 0.0080 | 0.22<br>95% CI: 0.05-0.90<br>p = 0.035 |
| DD 1-<3<br>(n = 991)  | 0.44<br>95% CI: 0.11-1.68<br>p = 0.23  | 0.48<br>95% CI: 0.23-0.97<br>p = 0.041  | 0.5<br>95% CI: 0.26-0.96<br>p = 0.036   | 0.95<br>95% CI: 0.27-3.30<br>p = 0.93 | 0.66<br>95% CI: 0.35-1.23<br>p = 0.19 | 0.76<br>95% CI: 0.28-2.03<br>p = 0.59  | 0.36<br>95% CI: 0.25-3.08<br>p = 0.85  | 0.44<br>95% CI: 0.11-1.68<br>p = 0.23  | 0.45<br>95% CI: 0.17-1.21<br>p = 0.11   | 1.02<br>95% CI: 0.28-3.76<br>p = 0.97 | 0.43<br>95% CI: 0.29-4.44<br>p = 0.33   | 0.36<br>95% CI: 0.25-3.08<br>p = 0.85  |
| DD 3-<10<br>(n = 439) | 0.25<br>95% CI: 0.06-1.07<br>p = 0.061 | 0.26<br>95% CI: 0.09-0.70<br>p = 0.0080 | 0.15<br>95% CI: 0.04-0.62<br>p = 0.0080 | 0.88<br>95% CI: 0.26-3.02<br>p = 0.84 | 0.81<br>95% CI: 0.32-2.07<br>p = 0.66 | 0.36<br>95% CI: 0.28-4.44<br>p = 0.89  | 0.36<br>95% CI: 0.25-3.08<br>p = 0.85  | 0.25<br>95% CI: 0.06-1.07<br>p = 0.061 | 0.15<br>95% CI: 0.04-0.62<br>p = 0.0080 | 1.02<br>95% CI: 0.28-3.76<br>p = 0.97 | 0.43<br>95% CI: 0.29-4.44<br>p = 0.33   | 0.36<br>95% CI: 0.25-3.08<br>p = 0.85  |
| DD ≥ 10<br>(n = 269)  | 0.25<br>95% CI: 0.06-1.07<br>p = 0.061 | 0.26<br>95% CI: 0.09-0.70<br>p = 0.0080 | 0.15<br>95% CI: 0.04-0.62<br>p = 0.0080 | 0.88<br>95% CI: 0.26-3.02<br>p = 0.84 | 0.81<br>95% CI: 0.32-2.07<br>p = 0.66 | 0.36<br>95% CI: 0.28-4.44<br>p = 0.89  | 0.36<br>95% CI: 0.25-3.08<br>p = 0.85  | 0.25<br>95% CI: 0.06-1.07<br>p = 0.061 | 0.15<br>95% CI: 0.04-0.62<br>p = 0.0080 | 1.02<br>95% CI: 0.28-3.76<br>p = 0.97 | 0.43<br>95% CI: 0.29-4.44<br>p = 0.33   | 0.36<br>95% CI: 0.25-3.08<br>p = 0.85  |

Abbreviations: CI, confidence interval; eGFR, estimated glomerular filtration rate; UFH, unfractionated heparin.  
Note: Adjusted for age, oxygen saturation, eGFR, D-dimer, time period, and ventilator requirement.

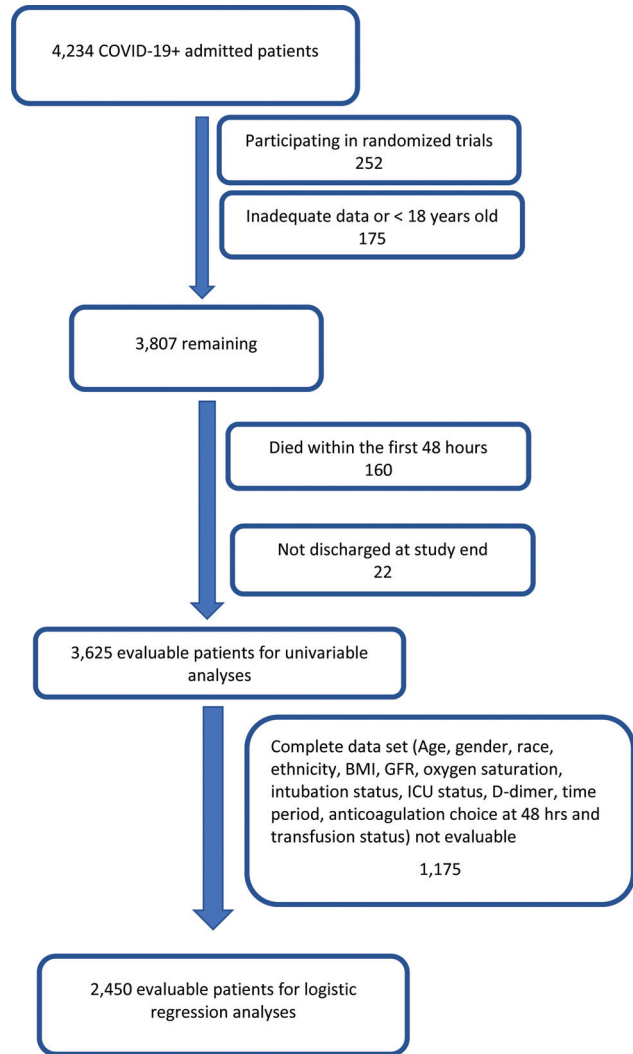

**Supplementary Fig. S1** Consort diagram for study.

**MONTEFIORE ANTICOAGULATION PROTOCOL  
FOR ADULT COVID-19+ INPATIENTS (Not Critical Care)**

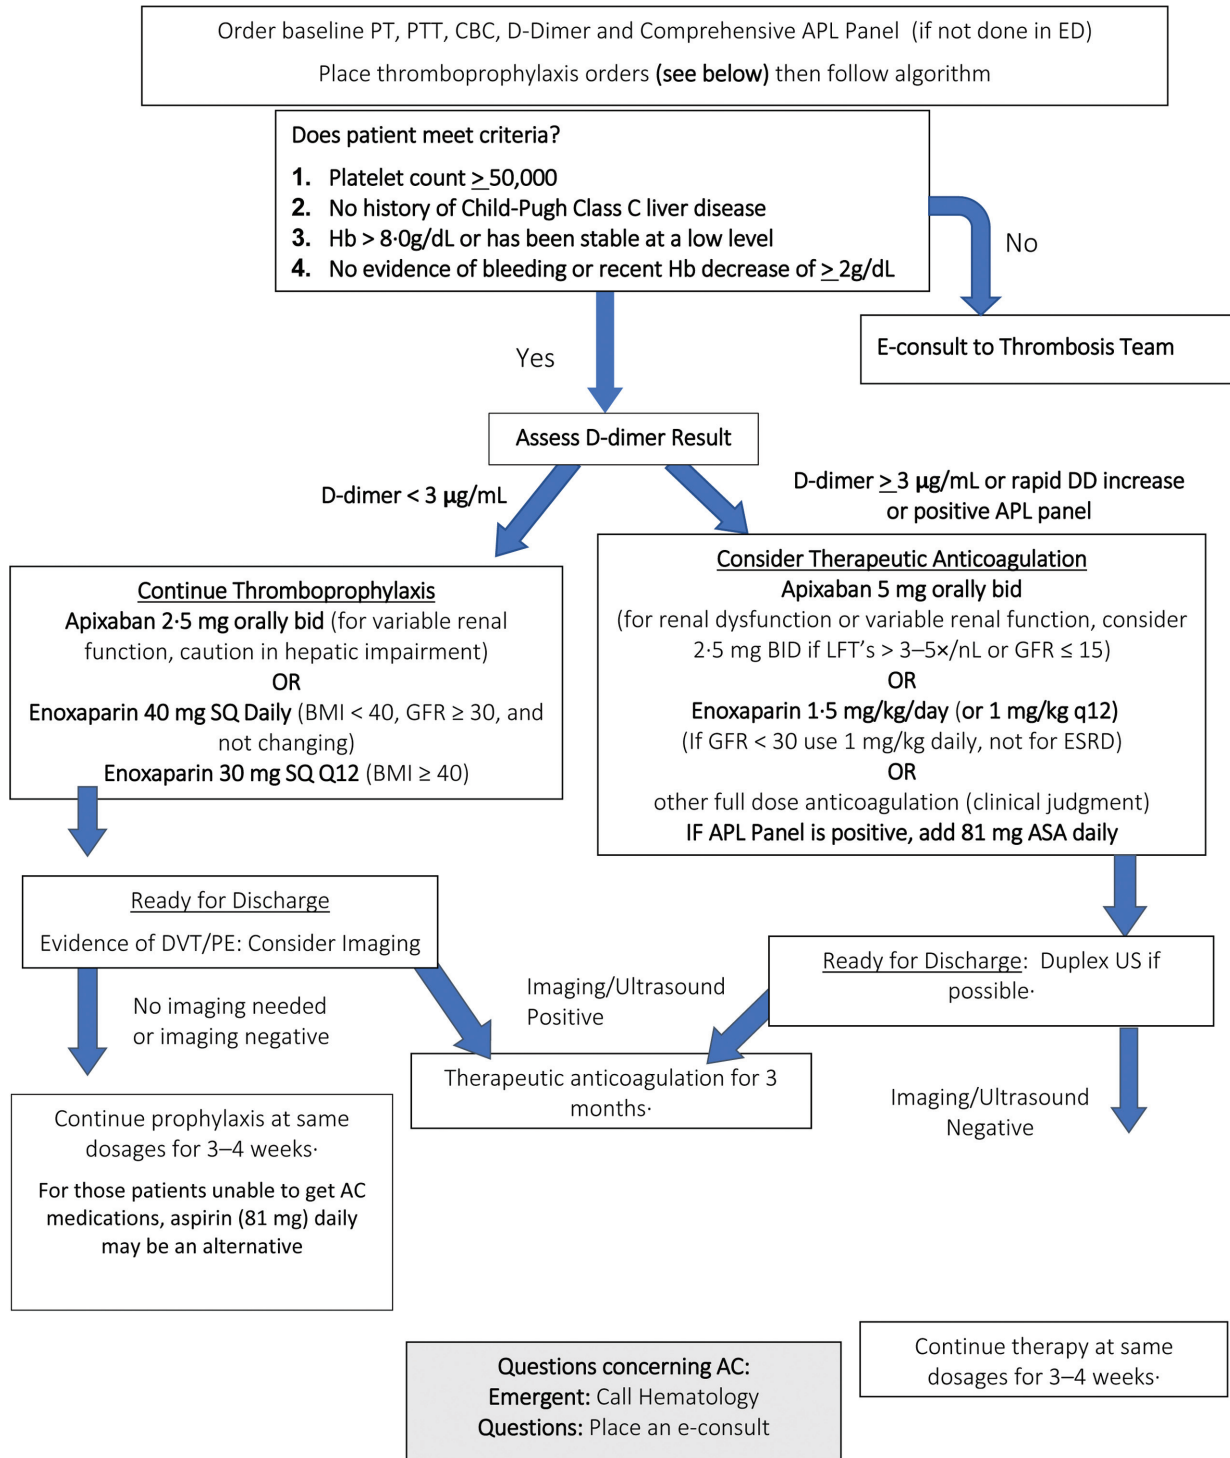

Supplementary Fig. S2 Anticoagulation protocol.

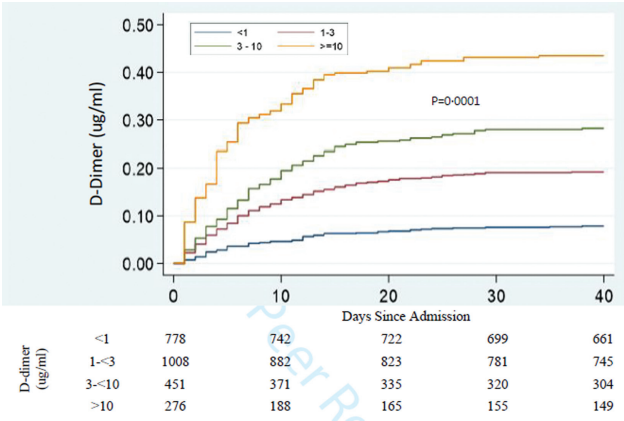

**Supplementary Fig. S3** Cumulative mortality according to initial D-dimer value.
